# Supplementary material
Source: publisher figshare collection journal article supplement (https://frontiersin.figshare.com/ndownloader/files/28762638)
Supplement: Supplementary file 1 [file 28762638]

**Supplementary Table S1.** Number of randomly picked CFUs/isolates secured from positive MPN enrichment tubes*, representing both plant compartments (endo-rhizosphere and endo-phyllosphere), developed on all tested culture media (leaf strips/root segments) under various oxygen conditions (ambient/limited), and further sub-cultured for 16S rRNA gene sequencing.

| **Incubation conditions** | **Plant compartments/ Culture Media** | **Total picked CFUs** | **Successfully sub-cultured isolates** | **Isolates of good quality sequence** |
| --- | --- | --- | --- | --- |
| Ambient oxygen | Endo-rhizosphere/Leaf strip (RL) | 177 | 82 | 22 |
| Endo- rhizosphere/ Root segment (RR) | 150 | 70 | 23 |
| Endo-phyllosphere/Leaf strip (PL) | 86 | 68 | 29 |
| Endo-phyllosphere/Root segment (PR) | 90 | 80 | 42 |
| Limited oxygen | Endo-rhizosphere/Leaf strip (RL) | 176 | 64 | 16 |
| Endo- rhizosphere/ Root segment (RR) | 139 | 79 | 8 |
| Endo-phyllosphere/Leaf strip (PL) | 145 | 56 | 11 |
| Endo-phyllosphere/Root segment (PR) | 106 | 67 | 12 |
| **Total** | | **1068** | **566** | **163** |

*Two positive MPN tubes were selected to represent the first two dilutions (10-1 and 10-2 for endo-phyllosphere and 10-2 and 10-3 for endo-rhizosphere) of tested culture media (leaf strips/root segments-based culture media) and growth conditions (ambient/limited oxygen). From each tube, 20 μl of homogenized surface/sub-surface pellicle were aseptically transferred to an agar plate of corresponding culture media; then carefully surface-spread with a sterile glass spatula , with which a second agar plate (palate 2) was surface- inoculated and further used as well to inoculate a more diluted third plate .After incubation (under ambient/limited oxygen) at 25oC for 7-15 days, all separated colonies developed on the more diluted plate 3 ( >30-100 colonies) were picked for further single colony isolation.

### Supplementary Table S3. Genera of culturable endophytic bacteria of sunflower isolated by *in situ similis* culturomic strategies compared to other conventional culturing methods reported in literature and to 16S rRNA Metagenomic Analysis (NGS).

| **Bacterial genera** | ***In situ similis* MPN culture method a** | ***In situ similis* leaf surface method b** | **Conventional culturing methods reported in literature c,1-6 and NGS analysis c,7** |
| --- | --- | --- | --- |
| *Achromobacter*  (or *Alcaligenes*) | - | - | Yes 3,6 |
| *Acidipila* | - | - | Yes 7 |
| *Acidovorax* | - | - | Yes 7 |
| *Acinetobacter* | Yes | - | Yes 6 |
| *Actinoallomurus* | - | - | Yes 7 |
| *Actinomadura* | - | - | Yes 7 |
| *Actinospica* | - | - | Yes 7 |
| *Aequorivita* | - | - | Yes 7 |
| *Aeromicrobium* | - | - | Yes 7 |
| *Agrobacterium* | Yes | - | Yes 6 |
| *Agrococcus* | - | - | Yes 7 |
| *Algoriphagus* | - | - | Yes 7 |
| *Altererythrobacter* | - | - | Yes 7 |
| *Amaricoccus* | - | - | Yes 7 |
| *Arenimonas* | - | - | Yes 7 |
| *Arsenophonus* | - | - | Yes 7 |
| *Arthrobacter* | - | - | Yes 7 |
| *Asticcacaulis* | - | - | Yes 6,7 |
| *Aurantimonas* | - | - | Yes 7 |
| *Aureimonas* | - | Yes | - |
| *Azospirillum* | - | - | Yes 6 |
| *Azotobacter* | - | - | Yes 5 |
| *Bacillus* | Yes | Yes | Yes 1,2,3,4,5,7 |
| *Bacteriovorax* | - | - | Yes 7 |
| *Bartonella* | - | - | Yes 7 |
| *Bdellovibrio* | - | - | Yes 7 |
| *Bosea* | Yes | - | Yes 7 |
| *Brevibacillus* | - | - | Yes 7 |
| *Brevundimonas* | Yes | - | Yes 7 |
| *Burkholderia* | - | - | Yes 6,7 |
| *Caenimonas* | - | - | Yes 7 |
| *Candidatus Portiera* | - | - | Yes 7 |
| *Candidimonas* | - | - | Yes 7 |
| ***Caulobacter*** | Yes | - | - |
| *Chitinophaga* | Yes | - | Yes 7 |
| *Conexibacter* | - | - | Yes 7 |
| *Chryseobacterium* | - | - | Yes 6,7 |
| *Curtobacterium* | - | Yes | Yes 7 |
| *Cytophaga* | - | - | Yes 7 |
| *Delftia* | - | - | Yes 7 |
| *Devosia* | - | - | Yes 7 |
| *Dokdonella* | - | - | Yes 7 |
| *Duganella* | - | - | Yes 7 |
| *Dyadobacter* | - | - | Yes 7 |
| *Dyella* | - | - | Yes 7 |
| *Edaphobacter* | - | - | Yes 7 |
| *Ensifer (Sinorhizobium)* | - | - | Yes 7 |
| *Enterobacter* | Yes | - | Yes 4,6,7 |
| *Erwinia* | - | Yes | Yes 7 |
| *Erythrobacter* | - | - | Yes 7 |
| *Escherichia* | - | - | Yes 7 |
| *Flavisolibacter* | - | - | Yes 7 |
| *Flavobacterium* | - | - | Yes 7 |
| *Fluviicola* | - | - | Yes 7 |
| *Frateuria* | - | - | Yes 7 |
| *Gemmobacter* | - | - | Yes 7 |
| *Geobacillus* | - | - | Yes 7 |
| *Gillisia* | - | - | Yes 7 |
| *Gordonia* | - | - | Yes 7 |
| *Granulicella* | - | - | Yes 7 |
| *Grimontella* | - | - | Yes 6 |
| *Gryllotalpicola* | - | - | Yes 7 |
| *Gynumella* | - | - | Yes 7 |
| *Halobacillus* | - | - | Yes 7 |
| *Herbaspirillum* | - | - | Yes 6 |
| *Hydrocarboniphaga* | - | - | Yes 7 |
| *Hydrogenophaga* | - | - | Yes 7 |
| *Hyphomicrobium* | - | - | Yes 7 |
| *Janthinobacterium* | - | - | Yes 7 |
| *Jatrophihabitans* | - | - | Yes 7 |
| *Jeotgalibacillus* | - | - | Yes 7 |
| *Kaistia* | - | - | Yes 7 |
| *Klebsiella* | - | - | Yes 4,6 |
| *Kluyvera* | - | - | Yes 7 |
| *Kocuria* | - | Yes | Yes 7 |
| *Kosakonia* | - | Yes | - |
| *Kribbella* | - | - | Yes 7 |
| *Laceyella* | - | - | Yes 7 |
| *Lactobacillus* | - | - | Yes 7 |
| *Leclercia* | - | - | Yes 7 |
| *Legionella* | - | - | Yes 7 |
| *Leifsonia* | - | - | Yes 7 |
| *Leuconostoc* | - | - | Yes 7 |
| *Limnobacter* | - | - | Yes 7 |
| *Loktanella* | - | - | Yes 7 |
| *Luteimicrobium* | - | - | Yes 7 |
| *Lysobacter* | - | - | Yes 7 |
| *Malikia* | - | - | Yes 7 |
| *Mariniflexile* | - | - | Yes 7 |
| *Marmoricola* | - | - | Yes 7 |
| *Massilia* | - | - | Yes 7 |
| *Mesorhizobium* | - | - | Yes 7 |
| *Methylobacterium* | - | - | Yes 2,7 |
| *Methylophaga* | - | - | Yes 7 |
| *Methylophilus* | - | - | Yes 7 |
| *Methylotenera* | - | - | Yes 7 |
| *Methylovorus* | - | - | Yes 7 |
| *Microbacterium* | - | Yes | Yes 6,7 |
| *Mitsuaria* | - | - | Yes 6 |
| *Moraxella* | - | - | Yes 6 |
| *Mucilaginibacter* | - | - | Yes 7 |
| *Mycobacterium* | - | - | Yes 7 |
| *Nakamurella* | - | - | Yes 7 |
| *Niabella* | - | - | Yes 7 |
| *Nocardia* | - | - | Yes 7 |
| *Nocardioides* | - | - | Yes 7 |
| *Novosphingobium* | Yes | - | Yes 6,7 |
| *Oceanobacillus* | - | - | Yes 7 |
| *Ochrobactrum* | - | - | Yes 7 |
| *Ornithinibacter* | - | - | Yes 7 |
| *Oxalicibacterium* | - | - | Yes 7 |
| *Paenibacillus* | Yes | Yes | Yes 1,7 |
| *Paenisporosarcina* | - | - | Yes 7 |
| *Panacagrimonas* | - | - | Yes 7 |
| *Pantoea* | Yes | Yes | Yes 6,7 |
| *Paracoccus* | Yes | Yes | Yes 7 |
| *Parvibaculum* | - | - | Yes 7 |
| *Patulibacter* | - | - | Yes 7 |
| *Pedobacter* | - | - | Yes 7 |
| *Peredibacter* | - | - | Yes 7 |
| *Phenylobacterium* | - | - | Yes 7 |
| *Phyllobacterium* | - | - | Yes 7 |
| *Planococcus* | - | - | Yes 7 |
| *Planomicrobium* | - | - | Yes 7 |
| *Pontibacter* | - | - | Yes 7 |
| *Propionibacterium* | - | - | Yes 7 |
| *Pseudaminobacter* | - | - | Yes 7 |
| *Pseudolabrys* | - | - | Yes 7 |
| *Pseudomonas* | Yes | - | Yes 5,6,7 |
| *Pseudonocardia* | - | - | Yes 7 |
| *Pseudorhodobacter* | - | - | Yes 7 |
| *Pseudoxanthomonas* | Yes | - | Yes 7 |
| *Pusillimonas* | - | - | Yes 7 |
| *Rathayibacter* | - | - | Yes 7 |
| *Rhizobium* | Yes | Yes | Yes 6,7 |
| *Rhizomicrobium* | - | - | Yes 7 |
| *Rhodanobacter* | - | - | Yes 7 |
| *Rhodococcus* | - | - | Yes 7 |
| *Rhodoferax* | - | - | Yes 7 |
| *Rhodoplanes* | - | - | Yes 7 |
| *Rhodopseudomonas* | - | - | Yes 7 |
| *Rugamonas* | - | - | Yes 7 |
| *Saccharopolyspora* | - | - | Yes 7 |
| *Salinibacterium* | - | - | Yes 7 |
| *Salinimicrobium* | - | - | Yes 7 |
| *Salinirepens* | - | - | Yes 7 |
| ***Scandinavium*** | Yes | - | - |
| *Segetibacter* | - | - | Yes 7 |
| *Serratia* | - | - | Yes 6 |
| *Shinella* | - | - | Yes 6,7 |
| *Sinorhizobium* | - | - | Yes 7 |
| *Skermanella* | - | - | Yes 7 |
| *Solimonas* | - | - | Yes 7 |
| *Sphingobacterium* | Yes | - | Yes 7 |
| *Sphingobium* | Yes | - | Yes 6 |
| *Sphingomicrobium* | - | - | Yes 7 |
| *Sphingomonas* | Yes | Yes | Yes 7 |
| *Sphingopyxis* | - | - | Yes 7 |
| *Sphingosinicella* | - | - | Yes 7 |
| *Sporichthya* | - | - | Yes 7 |
| *Sporosarcina* | - | - | Yes 7 |
| ***Starkeya*** | Yes | - | - |
| *Staphylococcus* | - | - | Yes 7 |
| *Stenotrophomonas* | - | Yes | Yes 6,7 |
| *Streptococcus* | - | - | Yes 7 |
| *Streptomyces* | - | - | Yes 7 |
| *Sulfuricella* | - | - | Yes 7 |
| *Thermoactinomyces* | - | - | Yes 7 |
| *Thermomonas* | - | - | Yes 7 |
| *Trabulsiella* | - | - | Yes 7 |
| *Variovorax* | - | - | Yes 6,7 |
| *Virgibacillus* | - | - | Yes 7 |
| *Vitellibacter* | - | - | Yes 7 |
| *Williamsia* | - | - | Yes 7 |
| *Winogradskyella* | - | - | Yes 7 |
| *Xanthomonas* | - | - | Yes 6 |

Yes, isolated; -, not isolated; bold genera, only found in *in situ similis* MPN culture method

**a** Current manuscript

**b** Nemr, R. A., Khalil, M., Sarhan, M. S., Abbas, M., Elsawey, H., et al. (2020). “*In situ similis*” culturing of plant microbiota: a novel simulated environmental method based on plant leaf blades as nutritional pads. *Front. Microbiol*. 11, 1–15. doi: 10.3389/fmicb.2020.00454

**c** Conventional culturing methods reported in literature:

1. Ambrosini, A., Stefanski, T., Lisboa, B. B., Beneduzi, A., Vargas, L. K., and Passaglia, L. M. P. (2016). Diazotrophic bacilli isolated from the sunflower rhizosphere and the potential of *Bacillus mycoides* B38V as biofertiliser. *Ann. Appl. Biol.* 168, 93–110. doi: 10.1111/aab.12245
2. Campos, K. G., Luisa, M. C., Cattelan, A. J., Nogueira, M. A., Guilherme, C. P., and Luiz, A. M. (2012). Biochemical and molecular characterization of high population density bacteria isolated from Sunflower. *J Microbiol Biotechnol.* 22, 437–447. doi: 10.4014/jmb.1109.09007
3. Forchetti, G., Masciarelli, O., Alemano, S., Alvarez, D., and Abdala, G. (2007). Endophytic bacteria in sunflower (*Helianthus annuus* L.): isolation, characterization, and production of jasmonates and abscisic acid in culture medium. *Appl. Microbiol. Biotechnol.* 76, 1145–1152. doi: 10.1007/s00253-007-1077-7
4. Liu, X., Li, X., Li, Y., Li, R., and Xie, Z. (2017). Plant growth promotion properties of bacterial strains isolated from the rhizosphere of the Jerusalem artichoke (*Helianthus tuberosus* L.) adapted to salt-alkaline soils and their effect on wheat growth. *Can. J Microbiol*. 63, 228–237. doi: 10.1139/cjm- 2016-0511
5. Raval, A. A., and Desai, P. B. (2012). Rhizobacteria from rhizosphere of sunflower (*Helianthus* *annuus* L.) and their effect on plant growth. *Res. J. Recent Sci*. 1, 58–61.
6. Ambrosini, A., Beneduzi, A., Stefanski, T., Pinheiro, F. G., Vargas, L. K., and Passaglia, L. M. P. (2012). Screening of plant growth promoting rhizobacteria isolated from sunflower (*Helianthus annuus* L.). *Plant and Soil* 356, 245–264. doi: 10.1007/s11104-011-1079-1
7. Tamošiūnė, I., Gelvonauskiene, D., Haimi, P., Mildažienė, V., Koga, K., Shiratani, M., et al. (2020). Cold plasma treatment of sunfl ower seeds modulates plant-associated microbiome and stimulates root and lateral organ growth. *Front Plant Sci.* 28, 1–13. doi.org/10.3389/fpls.2020.568924
